# Supplementary material for: Battery Electric Vehicle Energy Efficiency: Systematic Review and Meta-Analysis of Enabling Technologies
Source: Research Square preprint supplement (doi:10.21203/rs.3.rs-7756753/v1), 2025-11-18
Supplement: Supplementary file 1 [file 7aaa9335b25d05a3863fb350.docx]

| **Section and Topic** | **Item #** | **Checklist item** | **Location where item is reported** |
| --- | --- | --- | --- |
| **TITLE** | | |  |
| Title | 1 | The title identifies the report as a systematic review and meta-analysis of electric vehicle (EV) energy efficiency technologies. | Title page |
| **ABSTRACT** | | |  |
| Abstract | 2 | The abstract provides a structured summary including background, objectives, data sources, eligibility criteria, synthesis methods, results, and conclusions. | Abstract |
| **INTRODUCTION** | | |  |
| Rationale | 3 | The rationale explains the need for quantifying the real-world and simulated impacts of emerging EV efficiency technologies to guide research and policy. | Section 1-Introduction,  Section 3.3 |
| Objectives | 4 | To systematically identify, evaluate, and synthesize studies quantifying energy efficiency improvements in EVs due to technologies such as lightweighting, aerodynamics, regenerative braking, thermal management, and advanced power electronics. | Introduction, final paragraph |
| **METHODS** | | |  |
| Eligibility criteria | 5 | Studies were included if they reported measurable or claimed impacts on EV energy consumption or range. Both peer-reviewed publications and credible industrial reports were considered. Excluded were duplicates, studies lacking quantitative results, or those unrelated to EV efficiency (e.g., charging infrastructure, user behavior). | Section 2.2, 3.4 |
| Information sources | 6 | IEEE Xplore, ScienceDirect, SpringerLink, and Web of Science were searched, complemented by selected industry white papers, technical reports, and product claims. Searches covered publications up to 2024. | Section 2.1 |
| Search strategy | 7 | Keyword combinations such as “electric vehicle energy efficiency,” “aerodynamic drag reduction,” “lightweighting,” and “regenerative braking efficiency” were used. Boolean operators (AND, OR) refined results across multiple databases. | Section 2.1 |
| Selection process | 8 | Duplicate removal and screening were performed manually. Two reviewers independently screened titles, abstracts, and full texts for relevance; discrepancies were resolved by consensus. The PRISMA flowchart presented in the manuscript summarizes the process. | Section 3.2 |
| Data collection process | 9 | Data were extracted into a standardized Excel sheet. Quantitative metrics (efficiency improvement \%) were recorded and categorized by testing type (simulation, real-world, or estimation). | Section 2, 2.1 |
| Data items | 10 | Extracted data included: study type, technology category, reported energy efficiency improvement, publication year, and source. | Section 2.3 |
| Study risk of bias assessment | 11 | Since all studies were published technical or peer-reviewed sources, potential bias was qualitatively discussed based on reported methodology and testing conditions. | Section 3.2 |
| Effect measures | 12 | The percentage improvement in EV energy efficiency was used as the effect measure. Both fixed- and random-effects models were tested, with DerSimonian–Laird estimation of between-study variance Tau2. | Section 3.1, 3.5 |
| Synthesis methods | 13 | Heterogeneity was quantified using the *Q-*statistic and Tau2. Weighted means were computed using MATLAB and Python (NumPy, SciPy). Studies were grouped by technology type and evaluation method (simulation, estimate, or real-world). | Section 3.5 |
| Reporting bias assessment | 14 | Potential publication bias was assessed visually by comparing reported efficiency ranges across study types. No significant asymmetry was detected. | Section 3.2, 3.7 |
| Certainty assessment | 15 | Confidence in results was rated qualitatively based on study methodology, reporting transparency, and technology readiness level. | Section 3.4, 3.5 |
| **RESULTS** | | |  |
| Study selection | 16 | Total records identified: >350; after duplicate removal: 350. After screening, 190 full-text articles were reviewed, 81 met inclusion criteria, and 65 were included in quantitative synthesis. | Section 2.2 |
| Study characteristics | 17 | Included studies covered lightweighting, aerodynamics, regenerative braking, thermal management, and power electronics. They spanned publication years 2010–2024 and included academic and industry sources. | Section 9, Table 3 |
| Risk of bias in studies | 18 | Most included studies provided sufficient experimental or simulation detail, those with unclear methodologies were noted in limitations. | Section 3.4, 3.5 |
| Results of individual studies | 19 | Energy efficiency improvements ranged from 0.3% to 17.1%. Both simulation-based and real-world studies showed consistent improvement trends. | Table 1, Figure 4 |
| Results of syntheses | 20 | The pooled random-effects mean indicated a statistically significant overall improvement. Monte Carlo analysis confirmed robustness to study variance assumptions. | Section 9, Table 3 |
| Reporting biases | 21 | No substantial evidence of reporting bias was observed based on comparison of reported efficiency ranges across sources. | N. A. |
| Certainty of evidence | 22 | Moderate confidence due to diversity in data sources and testing methods, but consistent trends across studies reinforce validity. | Section 3.5 |
| **DISCUSSION** | | |  |
| Discussion | 23 | The findings consolidate evidence of measurable efficiency improvements achievable via current and emerging EV technologies. Limitations include heterogeneity in test conditions and incomplete reporting in some industrial sources. | Section 10 |
| **OTHER INFORMATION** | | |  |
| Registration and protocol | 24 | Not registered. No protocol was published prior to the review. | N. A. |
| Support | 25 | Conducted as part of academic research with no direct funding. Institutional support from the authors’ research group is acknowledged. | Funding statement subsection |
| Competing interests | 26 | The authors declare no competing interests. | Section 11 |
| Availability of data, code and other materials | 27 | All data are from published studies cited in the manuscript. MATLAB and Python scripts used for meta-analysis are available upon request. | N. A. |

*From:*  Page MJ, McKenzie JE, Bossuyt PM, Boutron I, Hoffmann TC, Mulrow CD, et al. The PRISMA 2020 statement: an updated guideline for reporting systematic reviews. BMJ 2021;372:n71. doi: 10.1136/bmj.n71. This work is licensed under CC BY 4.0. To view a copy of this license, visit <https://creativecommons.org/licenses/by/4.0/>
